# Supplementary material
Source: MDPI journal article supplement (https://www.mdpi.com/1996-1073/16/13/5239)
Supplement: s1 [file s1]

**The document is the supplementary material for the manuscript titled "Accurate Remaining Available Energy Estimation of LiFePO4 Battery in Dynamic Frequency Regulation for EVs with Thermal-Electric-Hysteresis Model."**

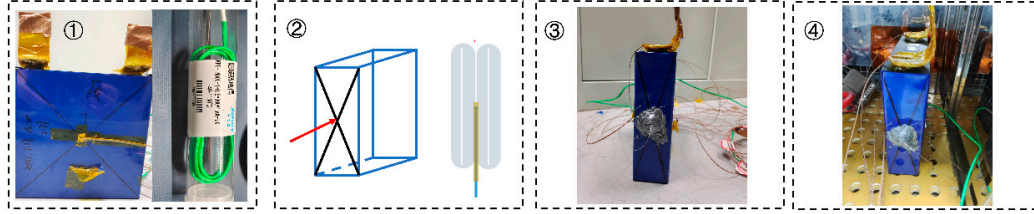

- Step 1. Discharge charge to 0 SOC, prepare K thermocouple and other materials.
- Step 2. Drill a hole in the side of the battery and insert a thermocouple insulated with polyimide tape.
- Step 3. Refill the electrolyte and seal with a solidified glue.
- Step 4. Set it aside for 24 hours to prepare for follow-up tests.

**Figure S1.** The detailed operating procedures of inserting thermocouple into the battery.

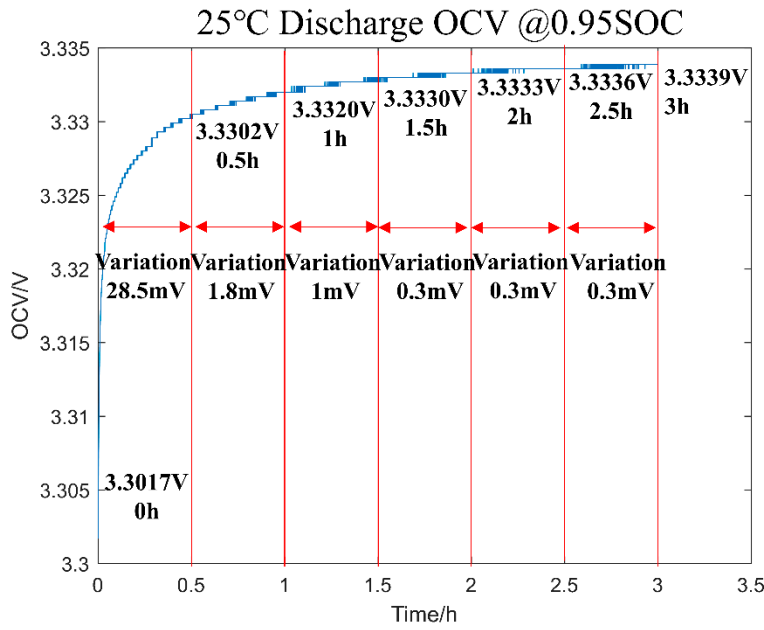

**Figure S2.** The variation of OCV over time.

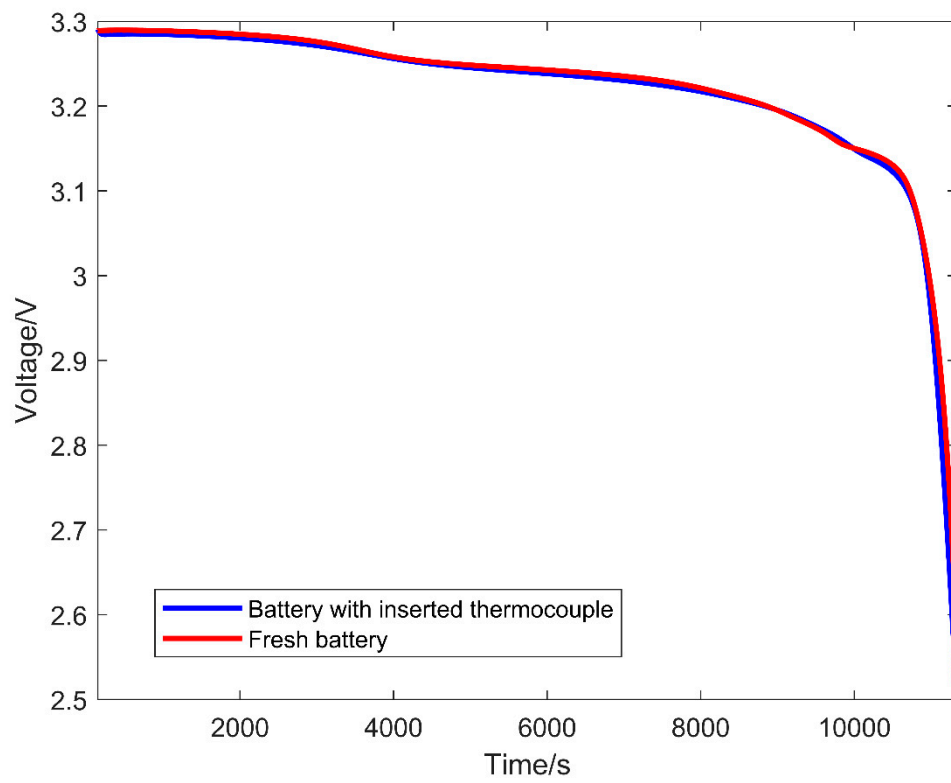

**Figure S3.** 1/3C discharge voltage curve.

Table S1 to Table S2 present the results of the identification of equivalent circuit model parameters.

**Table S1. C1 parameter identification results @ 25°C unit: F**

| SOC  | 1/3C   | 1/2C   | 1C    |
|------|--------|--------|-------|
| 1    | 128.02 | 88.49  | 86.22 |
| 0.95 | 114.86 | 81.38  | 67.53 |
| 0.9  | 87.70  | 74.44  | 64.50 |
| 0.85 | 92.33  | 74.41  | 63.82 |
| 0.8  | 100.16 | 78.20  | 64.49 |
| 0.75 | 96.61  | 101.82 | 67.17 |
| 0.7  | 94.21  | 99.15  | 67.61 |
| 0.65 | 94.25  | 99.68  | 68.74 |
| 0.6  | 86.65  | 69.97  | 62.18 |
| 0.55 | 76.21  | 66.60  | 61.02 |
| 0.5  | 77.29  | 66.91  | 61.04 |
| 0.45 | 86.87  | 69.34  | 61.90 |
| 0.4  | 92.59  | 72.74  | 63.65 |
| 0.35 | 91.32  | 70.77  | 62.52 |
| 0.3  | 89.17  | 74.69  | 62.71 |
| 0.25 | 86.62  | 93.68  | 62.45 |
| 0.2  | 84.28  | 90.88  | 64.35 |
| 0.15 | 82.01  | 88.12  | 72.50 |
| 0.1  | 78.40  | 84.18  | 52.41 |
| 0.05 | 38.60  | 43.79  | 51.61 |
| 0    | 142.85 | 142.85 | 125   |

**Table S2. C1 parameter identification results @ 35°C unit: F**

| SOC  | 1/3C   | 1/2C   | 1C     |
|------|--------|--------|--------|
| 1    | 142.85 | 98.19  | 108.18 |
| 0.95 | 84.18  | 71.14  | 81.46  |
| 0.9  | 74.17  | 67.61  | 77.31  |
| 0.85 | 72.18  | 65.47  | 74.68  |
| 0.8  | 71.66  | 64.40  | 72.32  |
| 0.75 | 72.75  | 64.35  | 70.16  |
| 0.7  | 70.76  | 62.73  | 69.17  |
| 0.65 | 80.74  | 68.85  | 71.33  |
| 0.6  | 70.34  | 64.13  | 74.22  |
| 0.55 | 68.70  | 63.10  | 73.41  |
| 0.5  | 67.93  | 62.35  | 72.69  |
| 0.45 | 68.73  | 62.51  | 72.51  |
| 0.4  | 70.48  | 63.37  | 72.85  |
| 0.35 | 68.92  | 62.45  | 73.25  |
| 0.3  | 69.51  | 62.43  | 70.71  |
| 0.25 | 70.48  | 62.61  | 72.73  |
| 0.2  | 73.43  | 63.86  | 69.71  |
| 0.15 | 93.10  | 73.18  | 67.73  |
| 0.1  | 62.09  | 55.80  | 60.94  |
| 0.05 | 40.01  | 47.499 | 57.87  |
| 0    | 142.85 | 111.11 | 100.00 |

**Table S3. C2 parameter identification results @ 25°C unit: F**

| SOC  | 1/3C   | 1/2C   | 1C     |
|------|--------|--------|--------|
| 1    | 181.99 | 203.96 | 375    |
| 0.95 | 80.12  | 115.04 | 270.18 |
| 0.9  | 89.25  | 112.04 | 244.38 |
| 0.85 | 80.04  | 103.03 | 216.25 |
| 0.8  | 70.11  | 92.22  | 188.40 |
| 0.75 | 67.63  | 71.30  | 162.02 |
| 0.7  | 65.95  | 69.51  | 154.32 |
| 0.65 | 65.98  | 69.77  | 159.83 |
| 0.6  | 75.83  | 99.89  | 224.42 |
| 0.55 | 82.23  | 103.12 | 230.59 |
| 0.5  | 79.09  | 99.78  | 219.94 |
| 0.45 | 70.30  | 93.79  | 204.70 |
| 0.4  | 64.79  | 87.66  | 190.45 |
| 0.35 | 63.97  | 87.66  | 194.29 |
| 0.3  | 62.40  | 80.66  | 182.10 |
| 0.25 | 60.63  | 65.53  | 169.50 |
| 0.2  | 59.00  | 63.61  | 153.68 |
| 0.15 | 57.41  | 61.68  | 125.00 |
| 0.1  | 54.88  | 58.92  | 165.86 |
| 0.05 | 81.00  | 84.78  | 141.91 |
| 0    | 161.52 | 183.94 | 308.57 |

**Table S4. C2 parameter identification results @ 35°C unit: F**

| SOC  | 1/3C   | 1/2C   | 1C     |
|------|--------|--------|--------|
| 1    | 242.92 | 311.35 | 300.00 |
| 0.95 | 158.23 | 288.68 | 246.58 |
| 0.9  | 189.15 | 280.28 | 234.04 |
| 0.85 | 175.44 | 256.91 | 230.10 |
| 0.8  | 161.81 | 233.20 | 234.87 |
| 0.75 | 146.21 | 206.31 | 251.43 |
| 0.7  | 145.01 | 205.48 | 253.30 |
| 0.65 | 127.73 | 174.81 | 284.84 |
| 0.6  | 168.81 | 242.84 | 224.98 |
| 0.55 | 174.96 | 255.37 | 216.99 |
| 0.5  | 169.95 | 246.62 | 217.97 |
| 0.45 | 161.15 | 230.93 | 223.78 |
| 0.4  | 151.66 | 213.79 | 237.44 |
| 0.35 | 157.07 | 224.11 | 225.60 |
| 0.3  | 144.86 | 201.85 | 229.58 |
| 0.25 | 134.40 | 184.22 | 244.35 |
| 0.2  | 123.23 | 166.83 | 252.81 |
| 0.15 | 94.95  | 126.87 | 275.07 |
| 0.1  | 128.29 | 178.22 | 179.21 |
| 0.05 | 135.03 | 195.71 | 201.26 |
| 0    | 222.92 | 275.64 | 300.00 |

**Table S5.  $R_{\text{dis}}$  parameter identification results @ 25°C unit: m $\Omega$** 

| SOC  | 1/3C | 1/2C | 1C   |
|------|------|------|------|
| 1    | 0.51 | 0.50 | 0.50 |
| 0.95 | 0.52 | 0.52 | 0.51 |
| 0.9  | 0.53 | 0.52 | 0.52 |
| 0.85 | 0.53 | 0.53 | 0.52 |
| 0.8  | 0.54 | 0.54 | 0.53 |
| 0.75 | 0.55 | 0.54 | 0.54 |
| 0.7  | 0.55 | 0.55 | 0.54 |
| 0.65 | 0.56 | 0.55 | 0.55 |
| 0.6  | 0.56 | 0.55 | 0.55 |
| 0.55 | 0.56 | 0.56 | 0.55 |
| 0.5  | 0.57 | 0.56 | 0.55 |
| 0.45 | 0.57 | 0.57 | 0.56 |
| 0.4  | 0.58 | 0.57 | 0.57 |
| 0.35 | 0.59 | 0.58 | 0.57 |
| 0.3  | 0.60 | 0.59 | 0.58 |
| 0.25 | 0.61 | 0.60 | 0.59 |
| 0.2  | 0.62 | 0.61 | 0.61 |
| 0.15 | 0.63 | 0.63 | 0.62 |
| 0.1  | 0.64 | 0.64 | 0.64 |
| 0.05 | 0.67 | 0.67 | 0.67 |
| 0    | 0.81 | 0.76 | 0.70 |

**Table S6.  $R_{\text{dis}}$  parameter identification results @ 35°C unit: m $\Omega$** 

| SOC  | 1/3C | 1/2C | 1C   |
|------|------|------|------|
| 1    | 0.40 | 0.40 | 0.40 |
| 0.95 | 0.41 | 0.40 | 0.40 |
| 0.9  | 0.41 | 0.41 | 0.41 |
| 0.85 | 0.41 | 0.41 | 0.41 |
| 0.8  | 0.42 | 0.42 | 0.42 |
| 0.75 | 0.42 | 0.42 | 0.42 |
| 0.7  | 0.43 | 0.43 | 0.42 |
| 0.65 | 0.43 | 0.43 | 0.42 |
| 0.6  | 0.43 | 0.43 | 0.42 |
| 0.55 | 0.43 | 0.43 | 0.42 |
| 0.5  | 0.43 | 0.43 | 0.43 |
| 0.45 | 0.43 | 0.43 | 0.43 |
| 0.4  | 0.44 | 0.44 | 0.43 |
| 0.35 | 0.44 | 0.44 | 0.44 |
| 0.3  | 0.45 | 0.45 | 0.44 |
| 0.25 | 0.45 | 0.45 | 0.45 |
| 0.2  | 0.46 | 0.46 | 0.46 |
| 0.15 | 0.47 | 0.47 | 0.46 |
| 0.1  | 0.47 | 0.47 | 0.47 |
| 0.05 | 0.49 | 0.49 | 0.49 |
| 0    | 0.59 | 0.55 | 0.51 |



**Table S7.  $R_{\text{char}}$  parameter identification results @ 25°C unit: m $\Omega$** 

| SOC  | 1/3C | 1/2C | 1C   |
|------|------|------|------|
| 1    | 0.51 | 0.50 | 0.50 |
| 0.95 | 0.50 | 0.50 | 0.50 |
| 0.9  | 0.51 | 0.51 | 0.51 |
| 0.85 | 0.52 | 0.52 | 0.51 |
| 0.8  | 0.53 | 0.52 | 0.52 |
| 0.75 | 0.53 | 0.53 | 0.52 |
| 0.7  | 0.54 | 0.54 | 0.53 |
| 0.65 | 0.55 | 0.55 | 0.53 |
| 0.6  | 0.55 | 0.54 | 0.53 |
| 0.55 | 0.55 | 0.55 | 0.53 |
| 0.5  | 0.55 | 0.55 | 0.54 |
| 0.45 | 0.56 | 0.55 | 0.54 |
| 0.4  | 0.56 | 0.56 | 0.55 |
| 0.35 | 0.57 | 0.56 | 0.55 |
| 0.3  | 0.58 | 0.57 | 0.55 |
| 0.25 | 0.59 | 0.58 | 0.56 |
| 0.2  | 0.59 | 0.59 | 0.57 |
| 0.15 | 0.60 | 0.59 | 0.57 |
| 0.1  | 0.61 | 0.60 | 0.58 |
| 0.05 | 0.62 | 0.62 | 0.60 |
| 0    | 0.81 | 0.76 | 0.70 |

**Table S8.  $R_{\text{char}}$  parameter identification results @ 35°C unit: m $\Omega$** 

| SOC  | 1/3C | 1/2C | 1C   |
|------|------|------|------|
| 1    | 0.40 | 0.40 | 0.40 |
| 0.95 | 0.39 | 0.39 | 0.39 |
| 0.9  | 0.40 | 0.40 | 0.39 |
| 0.85 | 0.40 | 0.40 | 0.40 |
| 0.8  | 0.40 | 0.40 | 0.40 |
| 0.75 | 0.41 | 0.41 | 0.40 |
| 0.7  | 0.41 | 0.41 | 0.41 |
| 0.65 | 0.41 | 0.41 | 0.41 |
| 0.6  | 0.41 | 0.41 | 0.41 |
| 0.55 | 0.41 | 0.41 | 0.41 |
| 0.5  | 0.41 | 0.41 | 0.41 |
| 0.45 | 0.42 | 0.42 | 0.41 |
| 0.4  | 0.42 | 0.42 | 0.41 |
| 0.35 | 0.42 | 0.42 | 0.42 |
| 0.3  | 0.43 | 0.43 | 0.42 |
| 0.25 | 0.43 | 0.43 | 0.44 |
| 0.2  | 0.44 | 0.44 | 0.43 |
| 0.15 | 0.44 | 0.44 | 0.43 |
| 0.1  | 0.44 | 0.44 | 0.45 |
| 0.05 | 0.47 | 0.46 | 0.45 |
| 0    | 0.59 | 0.55 | 0.51 |

**Table S9.  $\tau_1$  parameter identification results @ 25°C unit: s**

| SOC  | 1/3C  | 1/2C  | 1C    |
|------|-------|-------|-------|
| 1    | 44.80 | 30.97 | 34.49 |
| 0.95 | 40.20 | 28.48 | 27.01 |
| 0.9  | 30.69 | 26.05 | 25.80 |
| 0.85 | 32.31 | 26.04 | 25.53 |
| 0.8  | 35.05 | 27.37 | 25.79 |
| 0.75 | 33.81 | 35.64 | 26.87 |
| 0.7  | 32.97 | 34.70 | 27.04 |
| 0.65 | 32.99 | 34.88 | 27.49 |
| 0.6  | 30.33 | 24.49 | 24.87 |
| 0.55 | 26.67 | 23.31 | 24.40 |
| 0.5  | 27.05 | 23.41 | 24.41 |
| 0.45 | 30.40 | 24.27 | 24.76 |
| 0.4  | 32.40 | 25.46 | 25.46 |
| 0.35 | 31.96 | 24.77 | 25.00 |
| 0.3  | 31.21 | 26.14 | 25.08 |
| 0.25 | 30.31 | 32.78 | 24.98 |
| 0.2  | 29.50 | 31.80 | 25.74 |
| 0.15 | 28.70 | 30.84 | 29.00 |
| 0.1  | 27.44 | 29.46 | 20.96 |
| 0.05 | 13.51 | 15.32 | 20.64 |
| 0    | 50.00 | 50.00 | 50.00 |

**Table S10.  $\tau_1$  parameter identification results @ 35°C unit: s**

| SOC  | 1/3C  | 1/2C  | 1C    |
|------|-------|-------|-------|
| 1    | 50.00 | 44.18 | 50.00 |
| 0.95 | 29.46 | 32.01 | 21.11 |
| 0.9  | 25.96 | 30.42 | 20.70 |
| 0.85 | 25.26 | 29.46 | 21.29 |
| 0.8  | 25.08 | 28.98 | 22.90 |
| 0.75 | 25.46 | 28.95 | 25.71 |
| 0.7  | 24.76 | 28.23 | 25.87 |
| 0.65 | 28.26 | 30.98 | 28.32 |
| 0.6  | 24.62 | 28.86 | 20.85 |
| 0.55 | 24.04 | 28.39 | 19.57 |
| 0.5  | 23.77 | 28.06 | 20.06 |
| 0.45 | 24.05 | 28.12 | 21.55 |
| 0.4  | 24.66 | 28.51 | 23.88 |
| 0.35 | 24.12 | 28.10 | 22.09 |
| 0.3  | 24.32 | 28.09 | 23.35 |
| 0.25 | 24.66 | 28.17 | 26.54 |
| 0.2  | 25.70 | 28.74 | 27.86 |
| 0.15 | 32.58 | 32.93 | 33.86 |
| 0.1  | 21.73 | 25.11 | 16.29 |
| 0.05 | 9.21  | 16.64 | 18.79 |
| 0    | 50.00 | 50.00 | 50.00 |

**Table S11.  $\tau_2$  parameter identification results @ 25°C unit: s**

| SOC  | 1/3C  | 1/2C   | 1C     |
|------|-------|--------|--------|
| 1    | 90.99 | 101.98 | 150.00 |
| 0.95 | 40.06 | 57.52  | 108.07 |
| 0.9  | 44.62 | 56.02  | 97.75  |
| 0.85 | 40.02 | 51.51  | 86.50  |
| 0.8  | 35.05 | 46.11  | 75.36  |
| 0.75 | 33.81 | 35.65  | 64.80  |
| 0.7  | 32.97 | 34.75  | 61.72  |
| 0.65 | 32.99 | 34.88  | 63.93  |
| 0.6  | 37.91 | 49.94  | 89.76  |
| 0.55 | 41.11 | 51.56  | 92.23  |
| 0.5  | 39.54 | 49.89  | 87.97  |
| 0.45 | 35.15 | 46.89  | 81.88  |
| 0.4  | 32.39 | 43.83  | 76.18  |
| 0.35 | 31.98 | 43.83  | 77.71  |
| 0.3  | 31.20 | 40.33  | 72.84  |
| 0.25 | 30.31 | 32.76  | 67.80  |
| 0.2  | 29.50 | 31.80  | 61.47  |
| 0.15 | 28.70 | 30.84  | 50.00  |
| 0.1  | 27.44 | 29.46  | 66.34  |
| 0.05 | 40.50 | 42.39  | 56.76  |
| 0    | 80.76 | 91.97  | 123.43 |

**Table S12.  $\tau_2$  parameter identification results @ 35°C unit: s**

| SOC  | 1/3C   | 1/2C   | 1C     |
|------|--------|--------|--------|
| 1    | 121.46 | 140.11 | 150.00 |
| 0.95 | 79.11  | 129.90 | 123.29 |
| 0.9  | 94.57  | 126.12 | 117.02 |
| 0.85 | 87.72  | 115.61 | 115.05 |
| 0.8  | 80.90  | 104.94 | 117.43 |
| 0.75 | 73.10  | 92.84  | 125.71 |
| 0.7  | 72.50  | 92.46  | 126.65 |
| 0.65 | 63.86  | 78.66  | 142.42 |
| 0.6  | 84.40  | 109.28 | 112.49 |
| 0.55 | 87.48  | 114.91 | 108.49 |
| 0.5  | 84.97  | 110.98 | 108.98 |
| 0.45 | 80.57  | 103.91 | 111.89 |
| 0.4  | 75.83  | 96.20  | 118.72 |
| 0.35 | 78.53  | 100.85 | 112.80 |
| 0.3  | 72.43  | 90.83  | 114.79 |
| 0.25 | 67.20  | 82.90  | 122.17 |
| 0.2  | 61.61  | 75.07  | 126.40 |
| 0.15 | 47.47  | 57.09  | 137.53 |
| 0.1  | 64.14  | 80.20  | 89.60  |
| 0.05 | 67.51  | 88.07  | 100.63 |
| 0    | 111.46 | 124.03 | 150.00 |
